# Supplementary material for: Spatiotemporal Transformer Neural Network for Time-Series Forecasting
Source: MDPI journal article supplement (doi:10.3390/e24111651), 2022-11-14
Supplement: s1 [file s1]

---

## SUPPLEMENTAL INFORMATION FOR

### **Spatiotemporal transformer neural network (STNN) for multivariable short-term time-series prediction**

#### content

|                                                                               |    |
|-------------------------------------------------------------------------------|----|
| 1. Supplementary related works .....                                          | 2  |
| 1.1 Delay-embedding for spatial-temporal transformation equation .....        | 2  |
| 1.2 Transformer neural network for time series prediction.....                | 3  |
| 2. Supplementary Baselines .....                                              | 4  |
| 3. Supplementary Datasets .....                                               | 5  |
| 3.1 Nonlinear Pendulum.....                                                   | 5  |
| 3.2 Lorenz system .....                                                       | 5  |
| 3.3 Gene expression .....                                                     | 6  |
| 3.4 Traffic speed (TS) .....                                                  | 6  |
| 3.5 Solar irradiance .....                                                    | 6  |
| 3.6 Traffic Flow (TF) .....                                                   | 6  |
| 4. Supplementary Experiments .....                                            | 8  |
| 4.1 Nonlinear Pendulum.....                                                   | 8  |
| 4.2 Lorenz system .....                                                       | 8  |
| 4.3 Gene expression .....                                                     | 10 |
| 4.4 TS .....                                                                  | 10 |
| 4.5 Solar irradiance .....                                                    | 10 |
| 4.6 TF .....                                                                  | 11 |
| 4.7 Robustness.....                                                           | 11 |
| 4.8 Dimension experiment .....                                                | 12 |
| 4.9 The performance of STNN .....                                             | 20 |
| 5. Supplementary Figure .....                                                 | 23 |
| Supplementary Figure 5.1 The workflow of each computational experiment.....   | 23 |
| 6. Supplementary Algorithm.....                                               | 24 |
| Supplementary Algorithm 1 The algorithm of each computational experiment..... | 24 |
| 7. Supplementary codes.....                                                   | 25 |

# 1. Supplementary related works

## 1.1 Delay-embedding for spatial-temporal transformation equation

For a general discrete-time dynamical system, Eq. 1.1 defines the dynamical evolution of its state.

$$\mathbf{X}^{t+1} = \phi(\mathbf{X}^t) \quad (1.1)$$

Here,  $\mathbf{X}^t = (x_1^t, x_2^t, \dots, x_D^t)'$  are defined on a D-dimensional space at time step t, where symbol  $'$  means the transpose of a vector. The map  $\phi: \mathbb{R}^D \rightarrow \mathbb{R}^D$  is a nonlinear function, which pushes states from time t to time t + 1.

To bridge the spatial information and the temporal evolution information, we let  $\mathbf{Y}^t = (y^t, y^{t+1}, \dots, y^{t+L-1})' = (x_{\text{target}}^t, x_{\text{target}}^{t+1}, \dots, x_{\text{target}}^{t+L-1})'$  which are the values of one target variable selected from X for (L-1)-step-ahead prediction with  $L > 1$ . Note  $\mathbf{X}^t$  is spatial/high-dimensional information due to multiple (D) variables at one time point t while  $\mathbf{Y}^t$  is temporal information due to one variable at multiple (L) time points. When the system of Eq.(2.1) is on a steady state or on a manifold  $\mathcal{V}$  with dimension  $d$ , based on the Takens' embedding theorem, we can construct the following spatiotemporal information (STI) transformation equation, which maps the D-dimensional data  $\mathbf{X}^t$  to L-dimensional data  $\mathbf{Y}^t$ .

$$\Phi(\mathbf{X}^t) = \mathbf{Y}^t = (y^t, y^{t+1}, \dots, y^{t+L-1}) \quad (1.2)$$

where generally,  $D \gg L$  and  $L > 2d$ . Clearly, the spatiotemporal information (STI) transformation equation transforms the available/previous spatial information  $\mathbf{X}^t$  of multiple variables to the future temporal information  $\mathbf{Y}^t$  of one target variable at each time point t. If we measure a time-series with M points, we can rewrite Eq.1.2 in a matrix form of Eq.1.3.

$$\begin{bmatrix} \Phi_1(\mathbf{X}^1) & \Phi_1(\mathbf{X}^2) & \dots & \Phi_1(\mathbf{X}^M) \\ \Phi_2(\mathbf{X}^1) & \Phi_2(\mathbf{X}^2) & \dots & \Phi_2(\mathbf{X}^M) \\ \vdots & \vdots & \ddots & \vdots \\ \Phi_L(\mathbf{X}^1) & \Phi_L(\mathbf{X}^2) & \dots & \Phi_L(\mathbf{X}^M) \end{bmatrix} = \begin{bmatrix} y^1 & y^2 & \dots & y^M \\ y^2 & y^3 & \dots & \hat{y}^{M+1} \\ \vdots & \vdots & \ddots & \vdots \\ y^L & y^{L+1} & \dots & \hat{y}^{M+L-1} \end{bmatrix} \quad (1.3)$$

Since the observation variables are up to time step M, the  $\hat{\phantom{y}}$  indicates that the values of target variable y from time steps M+1 to M+L-1 need to be predicted in addition to the maps  $\Phi_i$  for  $i = 1, \dots, L$ , given  $\mathbf{X}^t$  for  $t=1, \dots, M$ . Thus, we can have (L-1)-step-ahead prediction of a target variable y by solving  $\Phi_i$  and  $\mathbf{Y}^t$  of Eqn.2.3 provided that  $\mathbf{X}^t$  for  $t=1, \dots, M$  are available. Generally, even if the dimension D of the original system is very high, the dimension d of its steady state or manifold is very low for most of real-world systems, i.e.  $D \gg d$ . Thus, we generally choose a small d by letting  $L=2d+1$  in the computation of Eq.1.3.

---

Several works have tried to predict high-dimensional short-term time series with STI equation. For example, Ma et al., firstly explored STI transformation equation and established a framework, named randomly distributed embedding (RDE), for one-step-ahead prediction of short-term time series. The novelty of this RDE framework roots in exploiting the information embedded in many low-dimensional non-delay attractors as well as in an appropriate use of the distribution of the target variable for prediction. Chen et al., developed an auto-reservoir computing framework, named Auto-Reservoir Neural Network (ARNN), to approximate the nonlinear STI equation to a linear-like form, which can efficiently make multi-step-ahead prediction based on a short-term high-dimensional time series. Such ARNN transformation equivalently expands the sample size but its linear-like approximation sacrifices the accuracy to some extent although it has great potential in practical applications of artificial intelligence and machine learning

## 1.2 Transformer neural network for time series prediction

Transformer has been widely used in the field of natural language processing, which is described in details by Vaswani et al.. Unlike sequence-aligned models, Transformer processes entire sequence of data and leverages classical self-attention mechanism to capture global dependencies of the sequence  $\mathbf{X}$  as Eq. 2.3, i.e..

$$\text{Attention}(\mathbf{Q}, \mathbf{K}, \mathbf{V}) = \text{Softmax}\left(\frac{\mathbf{Q}\mathbf{K}^T}{\sqrt{d_k}} \cdot \text{Mask}\right)\mathbf{V} \quad (2.3)$$

where query matrix  $\mathbf{Q} = \mathbf{X}\mathbf{W}_Q$ , key matrix  $\mathbf{K} = \mathbf{X}\mathbf{W}_K$  and value matrix  $\mathbf{V} = \mathbf{X}\mathbf{W}_V$  are transformed by  $\mathbf{X}$  respectively.  $\mathbf{W}_Q$ ,  $\mathbf{W}_K$  and  $\mathbf{W}_V$  are learnable parameter matrices. Note that a mask matrix is applied to filter out rightward attention by setting all upper triangular elements to  $-\infty$ , in order to avoid future information leakage.

However, at present, the transformer structure has not been well studied for processing high-dimensional short-term time series data. Besides, only a few studies consider the effective modeling of time series from the perspective of attention mechanism. For example, Shih et al., propose an attention mechanism to extract temporal patterns, which successfully captures the temporal information of time series. Moreover, self-attention enables Transformer to focus on different aspects of temporal patterns, and thus has a potential for time series prediction by reducing the unrelated variables.

---

## 2. Supplementary Baselines

**Baselines:** We select six time-series forecasting methods, including autoregressive integrated moving average (ARIMA), support vector regression with linear kernel (SVR), support vector regression with radial basis function (RBF), recurrent neural network (RNN), and Koopman autoencoder (KAE). To better explore the performance of continuous attention mechanism, we incorporate the canonical attention mechanism as STNN\*.

**Metrics:** We use Pearson Correlation Coefficient (PCC) and normalized Root mean square error (RMSE) to evaluate the difference between the prediction and the real results.

$$\text{PCC} = \frac{\sum_{i=m}^{m+L-1} (\hat{y}^i - \hat{\mu})(y^i - \mu)}{\hat{\sigma}\sigma} \quad (2.1)$$

$$\text{nRMSE} = \frac{\sqrt{\frac{1}{L} \sum_{i=m}^{m+L-1} \|\hat{y}^i - y^i\|^2}}{\sigma} \quad (2.2)$$

Here,  $\hat{y}^i$  is the predicted value at the time step  $i$ .  $\hat{\mu}$  and  $\mu$  is the mean value of the predictive and true data, respectively.  $\hat{\sigma}$  and  $\sigma$  is the variance of the predicted data and true data, respectively.

---

### 3. Supplementary Datasets

The datasets for STNN is available at <https://github.com/347251369/STNN>

#### 3.1 Nonlinear Pendulum

The nonlinear pendulum is a classic textbook example for dynamical systems, which is used for benchmarking models. We generated a dataset of nonlinear pendulum with 80 data points. This problem can be modeled as a second order ODE by:

$$\frac{d^2\theta}{dt^2} + \frac{g}{l}\sin\theta = 0 \quad (3.1)$$

where the angular displacement from an equilibrium is denoted by  $\theta \in [0, 2\pi)$ . We use  $l$  and  $g$  to denote the length and gravity, respectively, with  $l = 1$  and  $g = 9.8$  in practice. We consider the following initial conditions  $\theta(0) = \theta_0$  and  $\dot{\theta}(0) = 0$ . The motion of the pendulum is approximately harmonic for a small amplitude of the oscillation  $\theta_0 \ll 1$ . However, the problem becomes inherently nonlinear for large amplitudes of the oscillations. Through Eq.3.1 we get the 2-dimension position time-series  $\{x^t\}$ .

In addition, we map the sequence  $\{x^t\}$  to a high-dimensional space via a random orthogonal transformation to obtain the training snapshots, i.e.,  $\mathbf{P} \in \mathbb{R}^{64 \times 2}$  such that  $f(t) = \mathbf{P}x^t$  for any  $t$ . Finally, we get the 64-dimension nonlinear pendulum data.

In robustness experiment, we employ a white Gaussian noise term to the 64-dimension nonlinear pendulum data by Eq.3.2:

$$\{\tilde{x}_i^t = x_i^t + \varepsilon_i \quad (3.2)$$

Where  $\tilde{x}$  represent the  $i$ -th dimension time-series data with noise at time step  $t$ . And  $\varepsilon_i$  represent the noise terms for  $\tilde{x}_i^t$ , which are modeled as stochastic variables sampled from normal distributions  $\mathcal{N}(0, \sigma^2)$  with zero mean and standard deviation  $\sigma$ . The standard deviation  $\sigma$  can be used as the noise intensity.

#### 3.2 Lorenz system

The 90-dimension coupled Lorenz system is a classical system for studying essential dynamical characteristics of nonlinear systems, which is of great significance to model high-

dimensional nonlinear natural systems. We use the 90-dimension coupled Lorenz system which is composed of 30 subsystems formed as follow:

$$\begin{cases} \dot{x}_i = \alpha(y_i - x_i) + cx_{i-1} \\ \dot{y}_i = \rho x_i - y_i - x_i z_i \\ \dot{z}_i = x_i y_i - \beta z_i \end{cases} \quad (3.3)$$

where  $i \in [1, 30]$  denotes the  $i$ th subsystem, and  $c$  is the coupled factor for coupling the  $i$ th subsystem with the previous subsystem. This experiment sets  $c = 0.1, \rho = 28, \beta = 8/3, \alpha = 10$  as the constants for each subsystem. Since real world data exists a lot of noise, we employ a white Gaussian noise term to simulate the real situation:

$$\begin{cases} \tilde{x} = x + \varepsilon_x \\ \tilde{y} = y + \varepsilon_y \\ \tilde{z} = z + \varepsilon_z \end{cases} \quad (3.4)$$

where  $\tilde{x}$ ,  $\tilde{y}$  and  $\tilde{z}$  represent data with noise. And  $\varepsilon_x$ ,  $\varepsilon_y$  and  $\varepsilon_z$  represent the noise terms for  $x$ ,  $y$  and  $z$ , which are modeled as stochastic variables sampled from normal distributions  $\mathcal{N}(0, \sigma^2)$  with zero mean and standard deviation  $\sigma$ . The standard deviation  $\sigma$  can be used as the noise intensity.

### 3.3 Gene expression

We use the gene expression data of circadian rhythm in rat to test the STNN. Because of the complicated gene regulation mechanism, a large number of genes in a living organism usually form a high-dimensional dynamical system to facilitate various biological functions. Here, we employ STNN to predict the expression of a number of genes for circadian rhythm, which are measured by Affymetrix microarray on the laboratory rat with 84 genes and 22 time steps. Each time step is 2 hours.

### 3.4 Traffic speed (TS)

Traffic speed prediction is a vital topic in industry, which helps drivers make better travel decisions, alleviate traffic congestion and reduce carbon emissions. Here, we employ STNN to predict the traffic flow based on a dataset collected from 207 loop detectors at Highway 134 of Los Angeles County.

### 3.5 Solar irradiance

Prediction of solar irradiance is essential to minimize the energy costs and provide high power quality. Here, we employ STNN to predict the solar irradiance based on a dataset generated from 51 sampling sites in Wakkanai, Japan. The 51 sampling sites have formed a system to reflect the changes of solar irradiance by making a record every 10 minutes since 2011.

### 3.6 Traffic Flow (TF)

---

The data is originally collected from California department of transportation and describes the road occupy rate of Los Angeles County highway network. We here use the subset in which selects 228 sensors randomly with 40 days data points for each sensors.

## 4. Supplementary Experiments

### 4.1 Nonlinear Pendulum

We generate 80 data points by Eq.3.1. We divide the gene expression time series into a training and testing datasets. The training dataset is comprised of the first 63 steps, and the rest 17 steps is for the testing dataset. The results are list in Table S1.

Table S1. The prediction result of pendulum data.

| Dataset        | Metric | Methods      |       |        |              |              |       |              |
|----------------|--------|--------------|-------|--------|--------------|--------------|-------|--------------|
|                |        | STNN         | STNN* | ARIMA  | SVR          | RBF          | RNN   | KAE          |
| y <sub>1</sub> | PCC    | <b>0.998</b> | 0.958 | 0.097  | 0.983        | 0.992        | 0.901 | 0.975        |
|                | nRMSE  | <b>0.053</b> | 0.420 | 0.845  | 0.106        | 0.084        | 0.268 | 0.132        |
| y <sub>2</sub> | PCC    | 0.991        | 0.978 | 0.970  | <b>0.999</b> | 0.993        | 0.946 | 0.995        |
|                | nRMSE  | 0.237        | 0.449 | 0.317  | 0.343        | 0.390        | 0.268 | <b>0.135</b> |
| y <sub>3</sub> | PCC    | 0.998        | 0.948 | 0.712  | 0.992        | 0.995        | 0.969 | <b>0.999</b> |
|                | nRMSE  | <b>0.118</b> | 0.660 | 0.666  | 0.166        | 0.173        | 0.271 | 0.125        |
| y <sub>4</sub> | PCC    | 0.990        | 0.654 | -0.293 | 0.990        | <b>0.994</b> | 0.972 | 0.993        |
|                | nRMSE  | 0.174        | 0.829 | 0.889  | 0.096        | <b>0.113</b> | 0.226 | 0.126        |

### 4.2 Lorenz system

We generate 80 data points by Eq.3.2. We divide the gene expression time series into a training and testing datasets. The training dataset is comprised of the first 61 steps, and the rest 19 steps is for the testing dataset. The results are list in Table S2. In the experiment, Gaussian noise is set  $\sigma = 0$ .

Table S2. The prediction result of lorenz data.

| Dataset        | Metric | Methods      |        |       |        |        |        |        |
|----------------|--------|--------------|--------|-------|--------|--------|--------|--------|
|                |        | STNN         | STNN*  | ARIMA | SVR    | RBF    | RNN    | KAE    |
| y <sub>1</sub> | PCC    | <b>0.998</b> | -0.926 | 0.982 | -0.970 | -0.998 | 0.951  | -0.691 |
|                | nRMSE  | <b>0.070</b> | 3.770  | 0.306 | 2.000  | 1.905  | 2.300  | 3.088  |
| y <sub>2</sub> | PCC    | <b>0.985</b> | 0.085  | 0.717 | -0.271 | -0.702 | 0.417  | -0.733 |
|                | nRMSE  | <b>0.157</b> | 1.278  | 0.658 | 1.641  | 1.797  | 1.942  | 2.834  |
| y <sub>3</sub> | PCC    | <b>0.998</b> | -0.377 | 0.929 | 0.988  | 0.881  | 0.325  | 0.310  |
|                | nRMSE  | <b>0.126</b> | 2.407  | 1.071 | 0.676  | 0.978  | 1.123  | 1.142  |
| y <sub>4</sub> | PCC    | <b>1.000</b> | -1.000 | 0.998 | -0.972 | -0.967 | -0.461 | -0.985 |
|                | nRMSE  | <b>0.035</b> | 2.350  | 0.447 | 2.005  | 1.722  | 1.899  | 3.453  |

In order to clearly present the experiment of Lorentz system, we detail the Lorenz system experiment as follows.



We generate a 90-dimensional time series  $X^1, \dots, X^{80} \in \mathbb{R}^{90}$  with 80 steps by Eq 3.1. Then, we divide the generated time series into a training and testing datasets. The training dataset is comprised of 61 initial steps, and the rest is for the testing dataset. After we employ the preset parameters ( $D = 90, M = 61, L - 1 = 19$ ) to predict the 19-step-ahead values for four different target variables ( $y_1, y_2, y_3$  and  $y_4$ ) in Fig. S4.1.

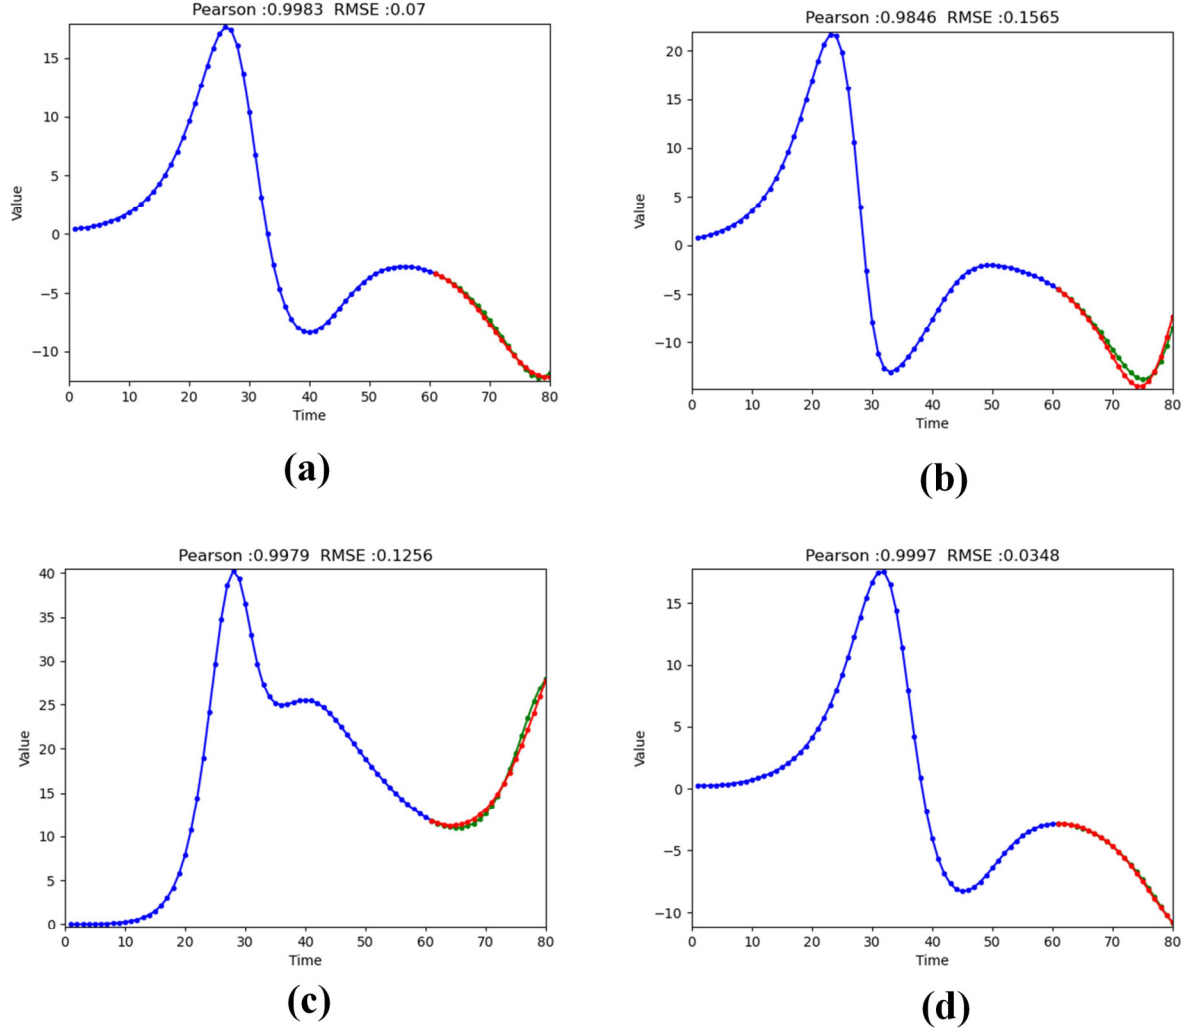

Figure S4.1 The prediction results of the Lorenz system by STNN. The abscissa represents the time range (80 steps), and the ordinate represents the target/prediction variable. The blue line represents the training data, the green line is the test data and the red line is the prediction data. (a-d) respectively represent the prediction results of four different target predicted variables of Lorenz subsystem.

### 4.3 Gene expression

We divide the gene expression time series into a training and testing datasets. The training dataset is comprised of the first 16 steps, and the rest 6 steps is for the testing dataset. We employed STNN to predict the 6-step-ahead values for four different target variables, which are shown in Table S3.

Table S3. The prediction result of gene data.

| Dataset        | Metric | Methods      |              |        |              |              |              |        |
|----------------|--------|--------------|--------------|--------|--------------|--------------|--------------|--------|
|                |        | STNN         | STNN*        | ARIMA  | SVR          | RBF          | RNN          | KAE    |
| y <sub>1</sub> | PCC    | 0.453        | 0.344        | 0.470  | <b>0.504</b> | 0.497        | -0.117       | 0.446  |
|                | nRMSE  | <b>0.671</b> | 1.039        | 1.080  | 0.720        | 1.158        | 1.831        | 1.952  |
| y <sub>2</sub> | PCC    | 0.252        | -0.151       | 0.067  | 0.118        | <b>0.315</b> | -0.702       | -0.032 |
|                | nRMSE  | <b>0.540</b> | 1.632        | 0.995  | 0.705        | 0.837        | 0.982        | 2.467  |
| y <sub>3</sub> | PCC    | 0.463        | <b>0.577</b> | -0.309 | 0.150        | 0.358        | 0.832        | -0.684 |
|                | nRMSE  | 0.707        | 0.691        | 1.114  | 1.074        | 1.260        | <b>0.548</b> | 1.107  |
| y <sub>4</sub> | PCC    | 0.412        | 0.754        | 0.745  | <b>0.843</b> | 0.615        | 0.673        | 0.012  |
|                | nRMSE  | 0.712        | 0.871        | 0.603  | <b>0.550</b> | 0.813        | 1.078        | 2.267  |

### 4.4 TS

We divide the traffic flow time series into a training and testing datasets. The training dataset is comprised of the first 71 steps, and the rest 19 is for testing dataset. We employed STNN to predict the 19-step-ahead values for four different target variables, which are shown in Table S4.

Table S4. The prediction result of TS data.

| Dataset        | Metric | Methods      |              |        |       |       |        |        |
|----------------|--------|--------------|--------------|--------|-------|-------|--------|--------|
|                |        | STNN         | STNN*        | ARIMA  | SVR   | RBF   | RNN    | KAE    |
| y <sub>1</sub> | PCC    | <b>0.948</b> | 0.931        | 0.595  | 0.544 | 0.442 | 0.650  | -0.730 |
|                | nRMSE  | <b>0.354</b> | 0.474        | 0.731  | 1.134 | 1.570 | 0.785  | 1.197  |
| y <sub>2</sub> | PCC    | 0.757        | <b>0.760</b> | -0.396 | 0.296 | 0.655 | 0.105  | 0.401  |
|                | nRMSE  | 0.642        | <b>0.639</b> | 1.199  | 1.304 | 1.445 | 1.152  | 0.818  |
| y <sub>3</sub> | PCC    | <b>0.917</b> | 0.857        | 0.473  | 0.507 | 0.460 | 0.215  | -0.317 |
|                | nRMSE  | <b>0.544</b> | 0.645        | 1.457  | 1.038 | 1.202 | 1.287  | 1.193  |
| y <sub>4</sub> | PCC    | <b>0.842</b> | 0.125        | 0.360  | 0.709 | 0.622 | -0.178 | -0.246 |
|                | nRMSE  | <b>0.476</b> | 1.262        | 0.941  | 1.426 | 0.996 | 1.702  | 1.894  |

### 4.5 Solar irradiance

We divide the solar irradiance time series into a training and testing datasets. The training dataset is comprised of the first 301 step solar irradianceps, and the rest 149 is for the testing

dataset. We employed STNN to predict the 149-step-ahead values for four different target variables, which are shown in Table S5.

Table S5. The prediction result of solar irradiance data.

| Dataset | Metric | Methods      |              |        |       |       |       |        |
|---------|--------|--------------|--------------|--------|-------|-------|-------|--------|
|         |        | STNN         | STNN*        | ARIMA  | SVR   | RBF   | RNN   | KAE    |
| $y_1$   | PCC    | 0.913        | <b>0.927</b> | -0.390 | 0.774 | 0.844 | 0.133 | 0.363  |
|         | nRMSE  | 0.497        | <b>0.440</b> | 1.221  | 0.760 | 0.999 | 1.982 | 2.030  |
| $y_2$   | PCC    | 0.945        | <b>0.938</b> | 0.379  | 0.847 | 0.802 | 0.054 | -0.081 |
|         | nRMSE  | 0.450        | <b>0.401</b> | 1.053  | 0.546 | 0.828 | 1.247 | 1.164  |
| $y_3$   | PCC    | <b>0.994</b> | 0.994        | 0.394  | 0.745 | 0.852 | 0.231 | -0.017 |
|         | nRMSE  | <b>0.108</b> | 0.110        | 1.178  | 0.725 | 1.028 | 1.335 | 1.538  |
| $y_4$   | PCC    | <b>0.942</b> | 0.945        | 0.370  | 0.207 | 0.824 | 0.202 | -0.223 |
|         | nRMSE  | 0.432        | <b>0.428</b> | 1.064  | 1.205 | 0.881 | 1.755 | 1.676  |

#### 4.6 TF

We divide the traffic speed time series into a training and testing datasets. The training dataset is comprised of the first 31 stepsolar irradiances, and the rest 7 is for the testing dataset. We employed STNN to predict the 7-step-ahead values for four different target variables, which are shown in Table S6.

Table S6. The prediction result of TF data.

| Dataset | Metric | Methods      |       |       |              |              |              |        |
|---------|--------|--------------|-------|-------|--------------|--------------|--------------|--------|
|         |        | STNN         | STNN* | ARIMA | SVR          | RBF          | RNN          | KAE    |
| $y_1$   | PCC    | 0.996        | 0.888 | 0.994 | <b>0.998</b> | 0.981        | <b>0.998</b> | 0.985  |
|         | nRMSE  | <b>0.150</b> | 0.428 | 0.308 | 0.216        | 1.132        | 0.815        | 7.583  |
| $y_2$   | PCC    | <b>1.000</b> | 0.849 | 1.000 | 0.999        | 0.993        | 0.998        | 0.972  |
|         | nRMSE  | <b>0.152</b> | 1.058 | 0.102 | 0.407        | 2.106        | 0.721        | 4.720  |
| $y_3$   | PCC    | 0.962        | 0.751 | 0.297 | 0.951        | <b>0.996</b> | -0.955       | 0.987  |
|         | nRMSE  | <b>0.135</b> | 0.719 | 0.858 | 0.624        | 1.083        | 1.354        | 8.317  |
| $y_4$   | PCC    | <b>0.999</b> | 0.896 | 0.993 | <b>0.999</b> | 0.989        | 0.986        | -0.311 |
|         | nRMSE  | <b>0.048</b> | 0.941 | 0.069 | 0.272        | 1.129        | 0.320        | 6.552  |

#### 4.7 Robustness

To test the robustness of STNN model, we increase the noise strength ( $\sigma$ ) on pendulum data and explore the change of prediction accuracy. Fig.2 shows the change of PCC and NRMSE with noise strength ( $\sigma$ ) from 0 to 0.5 on pendulum data for five different methods. The results are list in Table S7.

Table S7. The prediction result of robustness experiment.

| Noise strength( $\sigma$ ) | Metric | Methods |       |       |       |       |
|----------------------------|--------|---------|-------|-------|-------|-------|
|                            |        | STNN    | SVR   | RBF   | RNN   | KAE   |
| 0.00                       | PCC    | 0.995   | 0.991 | 0.993 | 0.971 | 0.990 |
|                            | nRMSE  | 0.078   | 0.178 | 0.190 | 0.213 | 0.129 |
| 0.05                       | PCC    | 0.995   | 0.989 | 0.993 | 0.965 | 0.988 |
|                            | nRMSE  | 0.081   | 0.178 | 0.187 | 0.213 | 0.144 |
| 0.10                       | PCC    | 0.994   | 0.986 | 0.992 | 0.976 | 0.986 |
|                            | nRMSE  | 0.089   | 0.178 | 0.186 | 0.197 | 0.157 |
| 0.15                       | PCC    | 0.992   | 0.982 | 0.989 | 0.976 | 0.984 |
|                            | nRMSE  | 0.100   | 0.178 | 0.186 | 0.192 | 0.203 |
| 0.20                       | PCC    | 0.990   | 0.977 | 0.987 | 0.972 | 0.979 |
|                            | nRMSE  | 0.114   | 0.183 | 0.188 | 0.210 | 0.210 |
| 0.25                       | PCC    | 0.987   | 0.970 | 0.982 | 0.971 | 0.973 |
|                            | nRMSE  | 0.130   | 0.204 | 0.197 | 0.215 | 0.239 |
| 0.30                       | PCC    | 0.984   | 0.965 | 0.977 | 0.970 | 0.969 |
|                            | nRMSE  | 0.150   | 0.205 | 0.204 | 0.234 | 0.273 |
| 0.35                       | PCC    | 0.979   | 0.958 | 0.970 | 0.973 | 0.963 |
|                            | nRMSE  | 0.170   | 0.226 | 0.216 | 0.237 | 0.280 |
| 0.40                       | PCC    | 0.975   | 0.950 | 0.962 | 0.962 | 0.957 |
|                            | nRMSE  | 0.188   | 0.243 | 0.229 | 0.242 | 0.300 |
| 0.45                       | PCC    | 0.969   | 0.941 | 0.954 | 0.963 | 0.950 |
|                            | nRMSE  | 0.209   | 0.262 | 0.242 | 0.252 | 0.319 |
| 0.50                       | PCC    | 0.964   | 0.930 | 0.946 | 0.956 | 0.944 |
|                            | nRMSE  | 0.231   | 0.288 | 0.259 | 0.250 | 0.333 |

#### 4.8 Dimension experiment

The dimension experiment results are shown in Fig.S4.2 and Table S8, and there are three approximate line level 1-2.

The line level 1 is  $y = 5.67$ , the line level 2 is  $y = 5.83$  and the line level 3 is  $y = 4.8M + 11.867$ .

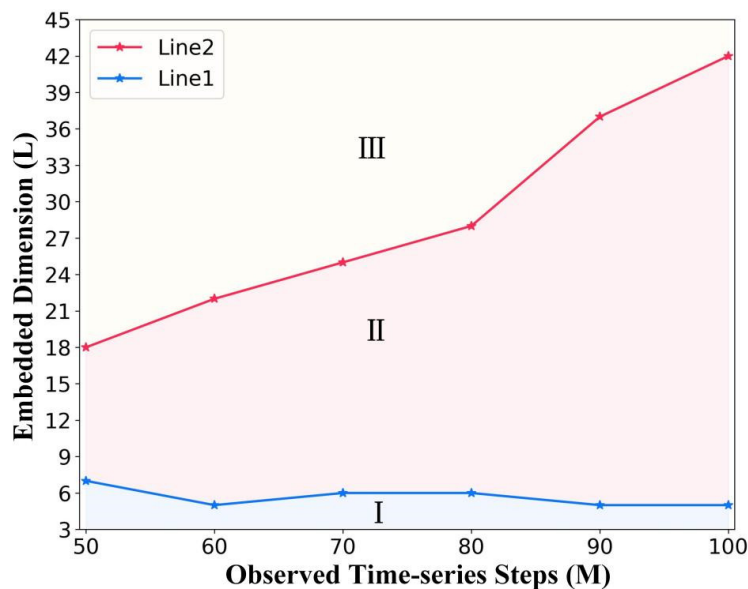

Figure S4.2. The change of the embedded dimension with the data length.

Table S8.1 The Forecasting metrics variation with embedded dimension L on observed time-series step on 50.

| Embedding<br>Dimension(L) | NRMSE         |               |               |               |               |
|---------------------------|---------------|---------------|---------------|---------------|---------------|
|                           | Dim1          | Dim2          | Dim3          | Dim4          | Mean          |
| 3                         | 2.8828        | 3.2903        | 3.5746        | 0.7662        | 2.6285        |
| 4                         | 0.4795        | 2.0223        | 4.8888        | 0.7721        | 2.0407        |
| 5                         | 0.3152        | 0.5720        | 2.5662        | 0.3644        | 0.9545        |
| 6                         | 0.6637        | 0.4173        | 1.3762        | 1.3913        | 0.9621        |
| <b>7</b>                  | <b>1.5788</b> | <b>0.9155</b> | <b>0.4574</b> | <b>1.4405</b> | <b>1.0980</b> |
| 8                         | 0.4990        | 0.3998        | 0.1524        | 0.4924        | 0.3859        |
| 9                         | 0.6054        | 0.4393        | 0.3908        | 0.5124        | 0.4870        |
| 10                        | 1.3205        | 0.4625        | 0.4145        | 0.2400        | 0.6094        |
| 11                        | 1.8008        | 0.9252        | 0.2334        | 0.2931        | 0.8131        |
| 12                        | 1.7388        | 0.8588        | 0.1254        | 0.6587        | 0.8454        |
| 13                        | 0.9662        | 1.4547        | 0.2035        | 0.3024        | 0.7317        |
| 14                        | 0.2749        | 0.7654        | 0.0758        | 0.4828        | 0.3997        |
| 15                        | 0.2575        | 0.5556        | 0.0611        | 0.3338        | 0.3020        |
| 16                        | 0.2250        | 0.3115        | 0.2297        | 0.2911        | 0.2643        |
| 17                        | 0.1827        | 0.3546        | 0.3128        | 0.2359        | 0.2715        |
| 18                        | 0.2452        | 0.2626        | 0.2519        | 0.1411        | 0.2252        |
| 19                        | 0.3042        | 0.1800        | 0.5359        | 0.2588        | 0.3197        |
| 20                        | 0.5329        | 0.6450        | 0.3659        | 0.3707        | 0.4786        |
| 21                        | 0.7572        | 1.2913        | 0.8516        | 0.6635        | 0.8909        |
| 22                        | 0.4271        | 1.1849        | 1.0773        | 0.5840        | 0.8183        |
| 23                        | 1.2413        | 1.6831        | 0.8743        | 0.7352        | 1.1335        |
| 24                        | 1.7756        | 2.6136        | 0.3898        | 2.5998        | 1.8447        |
| 25                        | 2.1650        | 1.7663        | 1.1050        | 1.4605        | 1.6242        |

Table S8.2 The Forecasting metrics variation with embedded dimension L on observed time-series step on 60.

| Embedding<br>Dimension(L) | NRMSE         |               |               |               |               |
|---------------------------|---------------|---------------|---------------|---------------|---------------|
|                           | Dim1          | Dim2          | Dim3          | Dim4          | Mean          |
| 3                         | 1.1398        | 1.7951        | 4.1762        | 2.5055        | 2.4042        |
| 4                         | 0.0621        | 0.0677        | 1.6360        | 1.5414        | 0.8268        |
| <b>5</b>                  | <b>1.3993</b> | <b>0.4725</b> | <b>0.4425</b> | <b>0.5279</b> | <b>0.7105</b> |
| 6                         | 0.4670        | 1.4181        | 0.1704        | 0.2475        | 0.5758        |
| 7                         | 0.5617        | 0.6400        | 0.3142        | 0.4410        | 0.4892        |
| 8                         | 1.4021        | 0.4009        | 0.8396        | 0.4697        | 0.7780        |
| 9                         | 1.5249        | 0.4163        | 0.9652        | 0.7988        | 0.9263        |
| 10                        | 1.1014        | 0.4786        | 0.7142        | 0.5390        | 0.7083        |
| 11                        | 0.7243        | 0.4496        | 0.7559        | 0.4477        | 0.5944        |
| 12                        | 0.4503        | 0.0323        | 0.2998        | 0.4113        | 0.2984        |
| 13                        | 0.3273        | 0.0611        | 0.0969        | 0.1452        | 0.1576        |
| 14                        | 0.4618        | 0.0576        | 0.2233        | 0.1538        | 0.2241        |
| 15                        | 0.2959        | 0.0400        | 0.0971        | 0.1349        | 0.1420        |
| 16                        | 0.1612        | 0.0367        | 0.1406        | 0.1196        | 0.1145        |
| 17                        | 0.1919        | 0.0219        | 0.1331        | 0.1716        | 0.1296        |
| 18                        | 0.1538        | 0.0266        | 0.0977        | 0.1240        | 0.1005        |
| 19                        | 0.1638        | 0.1434        | 0.1196        | 0.1320        | 0.1397        |
| 20                        | 0.3090        | 0.0568        | 0.1493        | 0.1085        | 0.1559        |
| 21                        | 0.3274        | 0.0421        | 0.2406        | 0.2425        | 0.2131        |
| 22                        | 0.1999        | 0.1146        | 0.1880        | 0.1350        | 0.1593        |
| 23                        | 0.1536        | 0.6463        | 0.4077        | 0.3399        | 0.3869        |
| 24                        | 0.4026        | 0.4588        | 0.4674        | 0.1795        | 0.3771        |
| 25                        | 0.8323        | 1.3748        | 0.9963        | 0.3355        | 0.8847        |
| 26                        | 0.5711        | 0.8120        | 0.9169        | 0.7658        | 0.7664        |
| 27                        | 1.2081        | 1.9044        | 1.5974        | 1.2663        | 1.4941        |
| 28                        | 0.6795        | 0.8061        | 1.4137        | 1.5453        | 1.1111        |
| 29                        | 1.0231        | 0.6893        | 1.1442        | 1.7078        | 1.1411        |
| 30                        | 1.0206        | 0.9491        | 2.6420        | 2.8121        | 1.8560        |

Table S8.3 The Forecasting metrics variation with embedded dimension L on observed time-series step on 70.

| Embedding<br>Dimension(L) | NRMSE         |               |               |               |               |
|---------------------------|---------------|---------------|---------------|---------------|---------------|
|                           | Dim1          | Dim2          | Dim3          | Dim4          | Mean          |
| 3                         | 18.1332       | 1.2142        | 2.0153        | 0.9152        | 5.5695        |
| 4                         | 1.9333        | 0.5974        | 4.8282        | 0.7437        | 2.0256        |
| 5                         | 2.1615        | 1.1932        | 4.2251        | 0.8718        | 2.1129        |
| <b>6</b>                  | <b>2.4311</b> | <b>1.1735</b> | <b>1.8931</b> | <b>1.0868</b> | <b>1.6461</b> |
| 7                         | 1.9580        | 0.7362        | 0.6561        | 0.8150        | 1.0413        |
| 8                         | 1.6712        | 0.3407        | 0.2987        | 0.4254        | 0.6840        |
| 9                         | 1.4558        | 0.6047        | 0.2808        | 0.9783        | 0.8299        |
| 10                        | 1.0780        | 0.3446        | 0.2426        | 0.3576        | 0.5057        |
| 11                        | 1.2238        | 0.6819        | 0.2081        | 1.1337        | 0.8119        |
| 12                        | 1.4871        | 0.3055        | 0.1954        | 0.3270        | 0.5787        |
| 13                        | 0.9408        | 0.2336        | 0.1435        | 0.3237        | 0.4104        |
| 14                        | 0.9009        | 0.2862        | 0.1421        | 0.2844        | 0.4034        |
| 15                        | 1.4783        | 0.2225        | 0.1285        | 0.3651        | 0.5486        |
| 16                        | 1.0102        | 0.1844        | 0.1406        | 0.2729        | 0.4020        |
| 17                        | 0.8588        | 0.1421        | 0.1068        | 0.1958        | 0.3259        |
| 18                        | 0.1952        | 0.1013        | 0.1046        | 0.1256        | 0.1317        |
| 19                        | 0.4638        | 0.0422        | 0.0528        | 0.0718        | 0.1577        |
| 20                        | 0.4658        | 0.1074        | 0.0846        | 0.2042        | 0.2155        |
| 21                        | 0.7427        | 0.2506        | 0.1328        | 0.2061        | 0.3330        |
| 22                        | 0.6325        | 0.1841        | 0.1345        | 0.2865        | 0.3094        |
| 23                        | 1.0631        | 0.1963        | 0.1501        | 0.2485        | 0.4145        |
| 24                        | 0.8319        | 0.2058        | 0.1219        | 0.1716        | 0.3328        |
| 25                        | 0.9336        | 0.1540        | 0.1243        | 0.1635        | 0.3439        |
| 26                        | 1.4993        | 0.1843        | 0.1821        | 0.2143        | 0.5200        |
| 27                        | 1.6023        | 0.2168        | 1.0448        | 0.1312        | 0.7488        |
| 28                        | 1.4085        | 0.5290        | 1.1417        | 0.6026        | 0.9204        |
| 29                        | 1.3382        | 0.8124        | 1.1876        | 1.0024        | 1.0852        |
| 30                        | 2.4835        | 1.1328        | 1.5156        | 1.6198        | 1.6879        |
| 31                        | 3.7070        | 2.3180        | 2.4966        | 3.2998        | 2.9554        |
| 32                        | 2.6886        | 2.2531        | 2.4450        | 2.5196        | 2.4766        |
| 33                        | 1.5552        | 1.4972        | 1.5697        | 1.3290        | 1.4878        |
| 34                        | 1.2196        | 1.1572        | 1.3953        | 0.8046        | 1.1442        |

---

|    |        |        |        |        |        |
|----|--------|--------|--------|--------|--------|
| 35 | 2.0798 | 2.2327 | 2.3047 | 1.4503 | 2.0169 |
|----|--------|--------|--------|--------|--------|

---

Table S8.4 The Forecasting metrics variation with embedded dimension L on observed time-series step on 80.

| Embedding<br>Dimension(L) | NRMSE         |               |               |               |               |
|---------------------------|---------------|---------------|---------------|---------------|---------------|
|                           | Dim1          | Dim2          | Dim3          | Dim4          | Mean          |
| 3                         | 0.8163        | 2.6240        | 0.2443        | 2.0234        | 1.4270        |
| 4                         | 0.1134        | 2.3056        | 0.5231        | 1.7355        | 1.1694        |
| 5                         | 0.8321        | 1.4892        | 0.7630        | 0.6873        | 0.9429        |
| <b>6</b>                  | <b>0.2414</b> | <b>0.0478</b> | <b>0.4788</b> | <b>2.9478</b> | <b>0.9290</b> |
| 7                         | 0.2664        | 0.3522        | 0.3420        | 0.4593        | 0.3550        |
| 8                         | 0.5238        | 0.3130        | 1.0886        | 0.4045        | 0.5825        |
| 9                         | 0.5913        | 0.4277        | 0.1912        | 0.3187        | 0.3822        |
| 10                        | 0.8416        | 0.2239        | 0.1631        | 0.1267        | 0.3388        |
| 11                        | 0.1731        | 0.3062        | 0.3903        | 0.3262        | 0.2990        |
| 12                        | 0.2650        | 0.4301        | 0.1380        | 0.6023        | 0.3589        |
| 13                        | 0.0771        | 0.3963        | 0.1758        | 0.2294        | 0.2197        |
| 14                        | 0.2249        | 0.2246        | 0.2795        | 0.3573        | 0.2716        |
| 15                        | 0.0493        | 0.1983        | 0.1308        | 0.3420        | 0.1801        |
| 16                        | 0.1303        | 0.1770        | 0.1718        | 0.2708        | 0.1875        |
| 17                        | 0.0669        | 0.1303        | 0.1020        | 0.1178        | 0.1043        |
| 18                        | 0.0404        | 0.1173        | 0.0680        | 0.0853        | 0.0778        |
| 19                        | 0.1371        | 0.1069        | 0.0622        | 0.1045        | 0.1027        |
| 20                        | 0.0532        | 0.2370        | 0.1177        | 0.1739        | 0.1455        |
| 21                        | 0.0886        | 0.2598        | 0.1528        | 0.1894        | 0.1727        |
| 22                        | 0.0186        | 0.1542        | 0.0934        | 0.1264        | 0.0982        |
| 23                        | 0.0861        | 0.1305        | 0.0792        | 0.1322        | 0.1070        |
| 24                        | 0.0777        | 0.1257        | 0.0826        | 0.0862        | 0.0931        |
| 25                        | 0.1354        | 0.1227        | 0.0813        | 0.2490        | 0.1471        |
| 26                        | 0.0476        | 0.1268        | 0.0874        | 0.1456        | 0.1019        |
| 27                        | 0.1753        | 0.1646        | 0.0668        | 0.1578        | 0.1411        |
| 28                        | 0.1652        | 0.1986        | 0.1155        | 0.2297        | 0.1773        |
| 29                        | 0.2292        | 0.4250        | 0.1363        | 0.3180        | 0.2771        |
| 30                        | 0.1882        | 0.2896        | 0.1711        | 0.4053        | 0.2636        |
| 31                        | 0.1212        | 0.2570        | 0.2712        | 0.1172        | 0.1917        |



|    |        |        |        |        |        |
|----|--------|--------|--------|--------|--------|
| 32 | 0.1939 | 0.7894 | 0.5380 | 0.1577 | 0.4198 |
| 33 | 0.1718 | 0.7741 | 0.4831 | 0.1289 | 0.3895 |
| 34 | 0.1163 | 0.6754 | 0.2030 | 0.0595 | 0.2636 |
| 35 | 0.2877 | 0.8991 | 0.2759 | 0.3752 | 0.4595 |
| 36 | 1.8945 | 0.3437 | 0.3833 | 0.3826 | 0.7510 |
| 37 | 1.5620 | 0.6351 | 0.3028 | 0.5476 | 0.7619 |
| 38 | 0.4859 | 1.0004 | 0.5944 | 0.3561 | 0.6092 |
| 39 | 1.4802 | 1.6679 | 0.8633 | 2.2118 | 1.5558 |
| 40 | 2.0917 | 2.2227 | 1.5415 | 1.4687 | 1.8312 |

Table S8.5 The Forecasting metrics variation with embedded dimension L on observed time-series step on 90.

| Embedding<br>Dimension(L) | NRMSE         |               |               |               |               |
|---------------------------|---------------|---------------|---------------|---------------|---------------|
|                           | Dim1          | Dim2          | Dim3          | Dim4          | Mean          |
| 3                         | 2.4461        | 1.1981        | 1.2395        | 1.7130        | 1.6492        |
| 4                         | 1.3743        | 0.6413        | 0.3841        | 1.9084        | 1.0770        |
| <b>5</b>                  | <b>0.0595</b> | <b>0.9962</b> | <b>2.0325</b> | <b>2.8431</b> | <b>1.4828</b> |
| 6                         | 0.3719        | 0.5555        | 0.2697        | 0.2612        | 0.3646        |
| 7                         | 0.0415        | 0.6403        | 0.4281        | 0.4733        | 0.3958        |
| 8                         | 0.3127        | 0.4136        | 1.0034        | 0.9306        | 0.6651        |
| 9                         | 0.2923        | 0.4570        | 0.9962        | 1.1007        | 0.7116        |
| 10                        | 0.1843        | 0.5472        | 0.7410        | 0.7975        | 0.5675        |
| 11                        | 0.2377        | 0.3335        | 0.5071        | 0.4971        | 0.3938        |
| 12                        | 0.3402        | 0.0391        | 0.4053        | 0.1948        | 0.2448        |
| 13                        | 0.1598        | 0.0281        | 0.2265        | 0.2681        | 0.1706        |
| 14                        | 0.1584        | 0.0373        | 0.2554        | 0.1716        | 0.1557        |
| 15                        | 0.0805        | 0.0224        | 0.1262        | 0.0950        | 0.0810        |
| 16                        | 0.0877        | 0.0406        | 0.1652        | 0.1690        | 0.1156        |
| 17                        | 0.0661        | 0.0197        | 0.1849        | 0.1778        | 0.1121        |
| 18                        | 0.0531        | 0.0451        | 0.0558        | 0.0887        | 0.0607        |
| 19                        | 0.1015        | 0.0260        | 0.1332        | 0.0911        | 0.0880        |
| 20                        | 0.2274        | 0.0276        | 0.2341        | 0.0659        | 0.1388        |
| 21                        | 0.1318        | 0.0446        | 0.2548        | 0.1084        | 0.1349        |
| 22                        | 0.1197        | 0.0313        | 0.1317        | 0.1368        | 0.1048        |
| 23                        | 0.1189        | 0.0187        | 0.1271        | 0.1647        | 0.1074        |

---

|    |        |        |        |        |        |
|----|--------|--------|--------|--------|--------|
| 24 | 0.0959 | 0.0277 | 0.1625 | 0.1877 | 0.1185 |
| 25 | 0.1006 | 0.0270 | 0.2796 | 0.3401 | 0.1868 |
| 26 | 0.0892 | 0.0380 | 0.2583 | 0.2589 | 0.1611 |
| 27 | 0.0977 | 0.0563 | 0.1475 | 0.1683 | 0.1174 |
| 28 | 0.1882 | 0.0602 | 0.1986 | 0.1358 | 0.1457 |
| 29 | 0.0914 | 0.0391 | 0.2194 | 0.1490 | 0.1247 |
| 30 | 0.1627 | 0.0327 | 0.1837 | 0.1811 | 0.1400 |
| 31 | 0.1135 | 0.0318 | 0.1773 | 0.1423 | 0.1162 |
| 32 | 0.1951 | 0.0529 | 0.2152 | 0.1582 | 0.1553 |
| 33 | 0.0969 | 0.0229 | 0.2128 | 0.1302 | 0.1157 |
| 34 | 0.0387 | 0.0713 | 0.1147 | 0.1119 | 0.0841 |
| 35 | 0.1146 | 0.0657 | 0.1647 | 0.1330 | 0.1195 |
| 36 | 0.0833 | 0.0895 | 0.1393 | 0.1179 | 0.1075 |
| 37 | 0.1006 | 0.0847 | 0.2095 | 0.1923 | 0.1468 |
| 38 | 0.2413 | 0.2303 | 0.4274 | 0.1993 | 0.2746 |
| 39 | 0.1294 | 0.6289 | 0.6871 | 0.5503 | 0.4989 |
| 40 | 1.1013 | 1.0247 | 0.7707 | 0.4263 | 0.8308 |
| 41 | 1.0756 | 1.9387 | 2.2709 | 1.0866 | 1.5930 |
| 42 | 1.7588 | 1.7765 | 1.4187 | 0.3316 | 1.3214 |
| 43 | 1.2608 | 1.0119 | 0.9061 | 0.1818 | 0.8402 |
| 44 | 0.3811 | 0.8203 | 1.2453 | 1.1311 | 0.8944 |
| 45 | 0.4676 | 0.7560 | 0.7190 | 0.6634 | 0.6515 |

---

Table S8.6 The Forecasting metrics variation with embedded dimension L on observed time-series step on 100.

| Embedding<br>Dimension(L) | NRMSE         |               |               |               |               |
|---------------------------|---------------|---------------|---------------|---------------|---------------|
|                           | Dim1          | Dim2          | Dim3          | Dim4          | Mean          |
| 3                         | 2.1064        | 0.8661        | 0.5977        | 1.1533        | 1.1809        |
| 4                         | 0.2344        | 0.5328        | 0.5151        | 0.8125        | 0.5237        |
| <b>5</b>                  | <b>0.4866</b> | <b>0.3750</b> | <b>0.5371</b> | <b>0.7241</b> | <b>0.5307</b> |
| 6                         | 0.4473        | 0.5212        | 0.2254        | 0.3368        | 0.3827        |
| 7                         | 0.1888        | 0.1520        | 0.2706        | 0.1736        | 0.1963        |
| 8                         | 0.8999        | 0.1194        | 0.2533        | 0.4698        | 0.4356        |
| 9                         | 0.3013        | 0.4144        | 0.1146        | 0.1457        | 0.2440        |
| 10                        | 0.3987        | 0.1361        | 0.0620        | 0.2554        | 0.2131        |

---

|    |        |        |        |        |        |
|----|--------|--------|--------|--------|--------|
| 11 | 0.1958 | 0.0864 | 0.1675 | 0.1042 | 0.1385 |
| 12 | 0.4461 | 0.0862 | 0.0290 | 0.0907 | 0.1630 |
| 13 | 0.0486 | 0.0334 | 0.0372 | 0.0352 | 0.0386 |
| 14 | 0.2343 | 0.0391 | 0.0488 | 0.0629 | 0.0963 |
| 15 | 0.1307 | 0.0226 | 0.0312 | 0.0339 | 0.0546 |
| 16 | 0.2663 | 0.0269 | 0.0288 | 0.0445 | 0.0916 |
| 17 | 0.0761 | 0.0247 | 0.0181 | 0.0407 | 0.0399 |
| 18 | 0.0241 | 0.0230 | 0.0276 | 0.0535 | 0.0320 |
| 19 | 0.0434 | 0.0214 | 0.0244 | 0.0286 | 0.0295 |
| 20 | 0.0521 | 0.0222 | 0.0132 | 0.0337 | 0.0303 |
| 21 | 0.0534 | 0.0126 | 0.0182 | 0.0169 | 0.0253 |
| 22 | 0.0213 | 0.0159 | 0.0133 | 0.0206 | 0.0178 |
| 23 | 0.0884 | 0.0179 | 0.0175 | 0.0253 | 0.0373 |
| 24 | 0.0489 | 0.0198 | 0.0232 | 0.0218 | 0.0284 |
| 25 | 0.0634 | 0.0229 | 0.0258 | 0.0368 | 0.0372 |
| 26 | 0.0631 | 0.0487 | 0.0245 | 0.0267 | 0.0408 |
| 27 | 0.1014 | 0.0392 | 0.0342 | 0.0649 | 0.0599 |
| 28 | 0.1765 | 0.0407 | 0.0264 | 0.0656 | 0.0773 |
| 29 | 0.1699 | 0.0292 | 0.0225 | 0.0298 | 0.0628 |
| 30 | 0.1352 | 0.0340 | 0.0379 | 0.0379 | 0.0612 |
| 31 | 0.1583 | 0.0318 | 0.0337 | 0.0546 | 0.0696 |
| 32 | 0.1932 | 0.0291 | 0.0232 | 0.0765 | 0.0805 |
| 33 | 0.1393 | 0.0261 | 0.0200 | 0.0496 | 0.0587 |
| 34 | 0.1033 | 0.0298 | 0.0227 | 0.0213 | 0.0443 |
| 35 | 0.1289 | 0.0256 | 0.0296 | 0.0659 | 0.0625 |
| 36 | 0.1462 | 0.0365 | 0.0258 | 0.0219 | 0.0576 |
| 37 | 0.1607 | 0.0273 | 0.0347 | 0.0753 | 0.0745 |
| 38 | 0.2227 | 0.0431 | 0.0318 | 0.1153 | 0.1032 |
| 39 | 0.2221 | 0.0458 | 0.0580 | 0.1153 | 0.1103 |
| 40 | 0.4303 | 0.2005 | 0.0315 | 0.2075 | 0.2175 |
| 41 | 0.2274 | 0.1905 | 0.0895 | 0.1576 | 0.1662 |
| 42 | 0.1597 | 0.1922 | 0.0469 | 0.0950 | 0.1234 |
| 43 | 0.2486 | 0.2144 | 0.2417 | 0.2797 | 0.2461 |
| 44 | 1.1895 | 0.7873 | 0.6234 | 0.7420 | 0.8355 |
| 45 | 2.4689 | 2.2236 | 1.2898 | 1.2632 | 1.8114 |
| 46 | 1.4748 | 1.6871 | 1.5471 | 1.3495 | 1.5146 |
| 47 | 0.4755 | 1.7138 | 1.7611 | 1.9210 | 1.4678 |

|    |        |        |        |        |        |
|----|--------|--------|--------|--------|--------|
| 48 | 1.3341 | 2.6054 | 2.0328 | 1.8301 | 1.9506 |
| 49 | 2.1340 | 2.3915 | 0.7074 | 1.2104 | 1.6108 |
| 50 | 1.0394 | 0.9596 | 1.1599 | 1.9062 | 1.2663 |

Table S8.7. The prediction result of dimension experiment.

| Embedding<br>Dimension(L) | Data length |    |    |    |    |     |
|---------------------------|-------------|----|----|----|----|-----|
|                           | 50          | 60 | 70 | 80 | 90 | 100 |
| level1                    | 7           | 5  | 6  | 6  | 5  | 5   |
| level3                    | 18          | 22 | 25 | 28 | 37 | 42  |

#### 4.9 The perfomance of STNN

Table S9.1. Forecasting metric variation with the observed time-series steps(M) on pendulum data.

| Var | Metric | Embedding Dimension(M) |        |        |        |
|-----|--------|------------------------|--------|--------|--------|
|     |        | 50                     | 60     | 70     | 80     |
| 1   | PCC    | 0.909                  | 0.9798 | 0.9972 | 0.9981 |
|     | NRMSE  | 0.5448                 | 0.2675 | 0.0838 | 0.0532 |
| 2   | PCC    | 0.8359                 | 0.9609 | 0.996  | 0.991  |
|     | NRMSE  | 0.8386                 | 0.2323 | 0.122  | 0.237  |

Table S9.2. Forecasting metric variation with the observed time-series steps(M) on solar data.

| Var | Metric | Embedding Dimension(M) |        |        |        |
|-----|--------|------------------------|--------|--------|--------|
|     |        | 375                    | 400    | 425    | 450    |
| 1   | PCC    | 0.2945                 | 0.2901 | 0.9381 | 0.945  |
|     | NRMSE  | 1.2469                 | 0.6968 | 0.5132 | 0.45   |
| 2   | PCC    | 0.5852                 | 0.9572 | 0.9924 | 0.9944 |
|     | NRMSE  | 1.8573                 | 0.3772 | 0.1276 | 0.1082 |

Table S9.3. Forecasting metric variation with the observed time-series steps(M) on TS data.

| Var | Metric | Embedding Dimension(M) |        |        |         |
|-----|--------|------------------------|--------|--------|---------|
|     |        | 45                     | 60     | 75     | 90      |
| 1   | PCC    | 0.1479                 | 0.9125 | 0.9185 | 0.948   |
|     | NRMSE  | 1.1953                 | 0.5887 | 0.4552 | 0.35411 |
| 2   | PCC    | 0.0122                 | 0.6617 | 0.6062 | 0.9172  |
|     | NRMSE  | 2.1012                 | 1.2036 | 0.9442 | 0.5444  |

Table S9.4. Forecasting metric variation with the dimension of time-series(D) on pendulum data.

| Var | Metric | Embedding Dimension(M) |        |        |
|-----|--------|------------------------|--------|--------|
|     |        | 24                     | 44     | 64     |
| 1   | PCC    | 0.9959                 | 0.9943 | 0.9981 |
|     | NRMSE  | 0.0648                 | 0.0746 | 0.0532 |
| 2   | PCC    | 0.9866                 | 0.9839 | 0.991  |
|     | NRMSE  | 0.2141                 | 0.1621 | 0.237  |

Table S9.5. Forecasting metric variation with the dimension of time-series(D) on solar data.

| Var | Metric | Embedding Dimension(M) |        |        |        |
|-----|--------|------------------------|--------|--------|--------|
|     |        | 21                     | 31     | 41     | 51     |
| 1   | PCC    | 0.9483                 | 0.9392 | 0.955  | 0.945  |
|     | NRMSE  | 0.4016                 | 0.4664 | 0.4043 | 0.45   |
| 2   | PCC    | 0.9941                 | 0.9944 | 0.9932 | 0.9944 |
|     | NRMSE  | 0.1113                 | 0.1095 | 0.1192 | 0.1082 |

Table S9.6. Forecasting metric variation with the dimension of time-series(D) on TS data.

| Var | Metric | Embedding Dimension(M) |        |        |        |
|-----|--------|------------------------|--------|--------|--------|
|     |        | 57                     | 107    | 157    | 207    |
| 1   | PCC    | 0.9742                 | 0.9385 | 0.9692 | 0.948  |
|     | NRMSE  | 0.2918                 | 0.4661 | 0.35   | 0.3541 |
| 2   | PCC    | 0.9095                 | 0.9088 | 0.901  | 0.9172 |
|     | NRMSE  | 0.5733                 | 0.5652 | 0.6057 | 0.5444 |

Table S9.7. Forecasting metric variation with the embedded dimension(L) on pendulum data.

| Var | Metric | Embedding Dimension(M) |        |        |        |        |        |        |         |
|-----|--------|------------------------|--------|--------|--------|--------|--------|--------|---------|
|     |        | 5                      | 10     | 15     | 20     | 25     | 30     | 35     | 40      |
| 1   | PCC    | 0.999                  | 0.9197 | 0.9968 | 0.9981 | 0.9947 | 0.9934 | 0.9972 | -0.5222 |
|     | NRMSE  | 0.8321                 | 0.8416 | 0.0493 | 0.0532 | 0.1354 | 0.1882 | 0.2877 | 2.0917  |
| 2   | PCC    | 0.9533                 | 0.9797 | 0.9833 | 0.991  | 0.9901 | 0.977  | 0.711  | -0.1251 |
|     | NRMSE  | 1.4892                 | 0.2239 | 0.1983 | 0.237  | 0.1227 | 0.2896 | 0.8991 | 2.2227  |

Table S9.8. Forecasting metric variation with the embedded dimension(L) on solar data.

| Var | Metric | Embedding Dimension(M) |        |        |        |        |        |        |        |
|-----|--------|------------------------|--------|--------|--------|--------|--------|--------|--------|
|     |        | 25                     | 50     | 75     | 100    | 125    | 150    | 175    | 200    |
| 1   | PCC    | inf                    | inf    | 0.1199 | 0.8159 | 0.9123 | 0.945  | 0.6932 | 0.509  |
|     | NRMSE  | inf                    | 0.6554 | 0.5582 | 0.7331 | 0.4094 | 0.45   | 0.8726 | 3.177  |
| 2   | PCC    | inf                    | inf    | 0.8855 | 0.9957 | 0.9908 | 0.9944 | 0.7665 | 0.7649 |
|     | NRMSE  | inf                    | 0.1722 | 0.097  | 0.1076 | 0.1574 | 0.1082 | 0.6926 | 1.1566 |

Table S9.9. Forecasting metric variation with the embedded dimension(L) on TS data.

| Var | Metric | Embedding Dimension(M) |        |        |        |        |        |        |         |
|-----|--------|------------------------|--------|--------|--------|--------|--------|--------|---------|
|     |        | 5                      | 10     | 15     | 20     | 25     | 30     | 35     | 40      |
| 1   | PCC    | 0.8504                 | 0.9687 | 0.9201 | 0.948  | 0.8568 | 0.6937 | 0.5735 | -0.0007 |
|     | NRMSE  | 1.0136                 | 0.3515 | 0.6944 | 0.3541 | 0.4906 | 0.7429 | 0.8787 | 1.6075  |
| 2   | PCC    | -0.7726                | 0.8406 | 0.9503 | 0.9172 | 0.8861 | 0.9398 | 0.8619 | 0.2572  |
|     | NRMSE  | 1.6579                 | 0.2756 | 0.3665 | 0.5444 | 0.6685 | 0.547  | 0.7425 | 1.0726  |

## 5. Supplementary Figure

Supplementary Figure S5.1 The workflow of each computational experiment

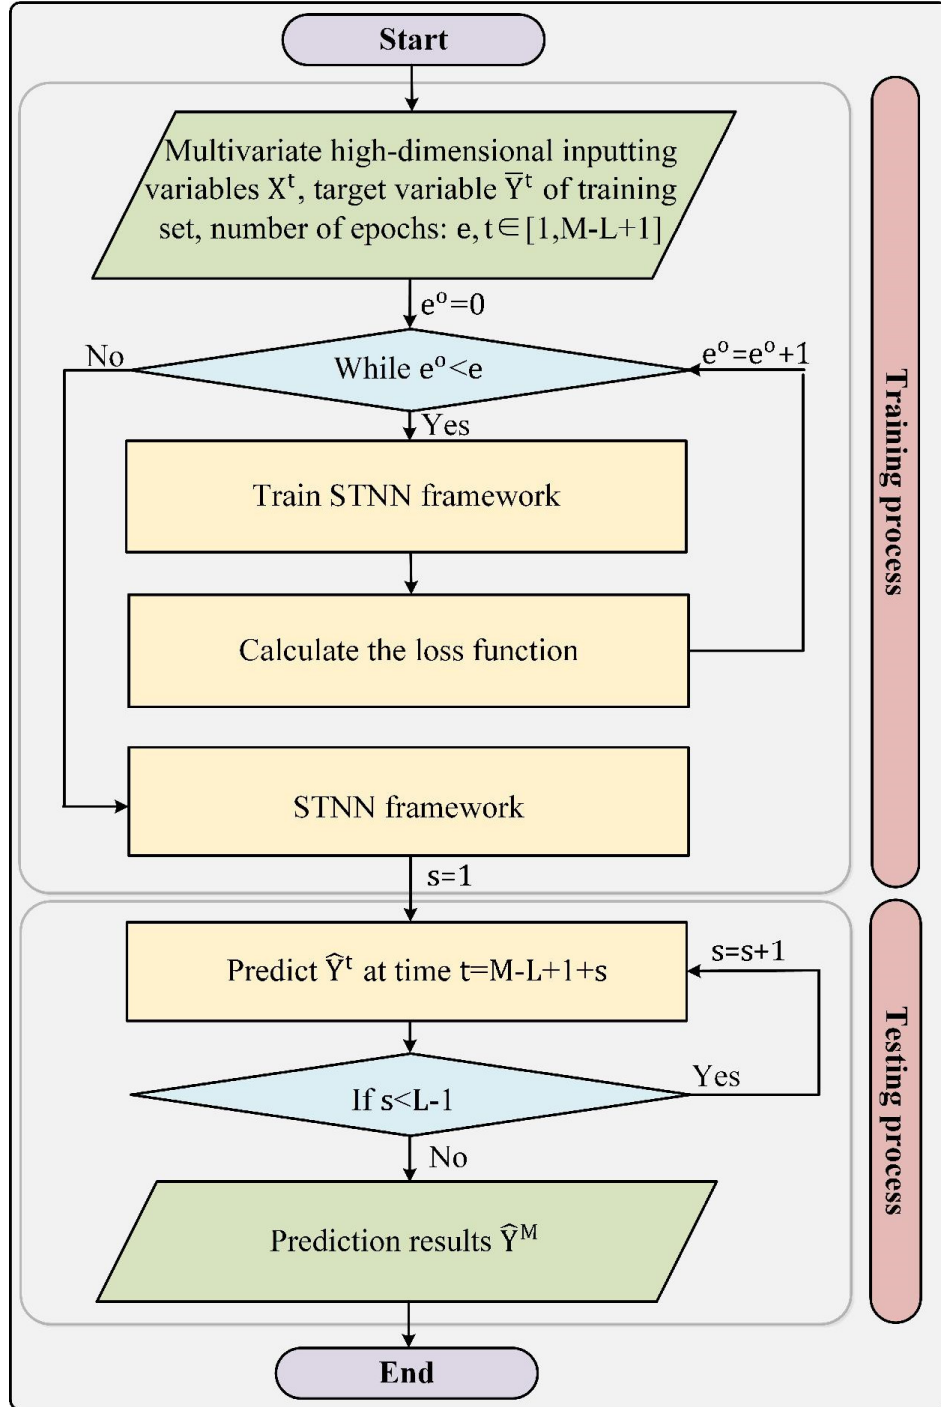

Figure S5.1. Workflow of each computational experiment.

---

## 6. Supplementary Algorithm

### Supplementary Algorithm S1 The algorithm of each computational experiment

---

**Algorithm 1:** the workflow of each computational experiment

---

**Input:** Multivariate high-dimensional inputting variables  $X^t$ , target variable  $\bar{Y}^t$  of training set

**Parameter:** Number of epochs:  $e$ ,  $t \in [1, M-L+1]$

**Output:** Prediction results  $\hat{Y}^M$

```
1: Let  $e^0 = 0$ 
2: while  $e^0 < e$  do
3:   Train STNN framework
4:   Calculate the loss function
      $e^0 \leftarrow e^0 + 1$ 
5: end while
6: Obtain STNN framework
7: Let  $s = 1$ 
8: Predict  $\hat{Y}^t$  at time  $t=M-L+1+s$ 
9: if  $s < L - 1$  then
10:   $s \leftarrow s + 1$ ; goto step 8
11: end if
12: return  $\hat{Y}^M$ 
```

---



---

## 7. **Supplementary codes**

The codes for STNN is available at <https://github.com/347251369/STNN>
